# Supplementary material for: Efficacy and safety of robotic spine surgery: systematic review and meta-analysis
Source: PubMed Central journal article supplement (PMC9569281; doi:10.1186/s10195-022-00669-0), 2022-10-15
Supplement: 10195_2022_669_MOESM1_ESM.pdf [file 10195_2022_669_MOESM1_ESM.pdf]

Supplementary material. Table GRADE-Summary of findings

| Certainty assessment                |              |               |              |             |                  |                               | Summary of findings   |                      |                          |                              |                                      |
|-------------------------------------|--------------|---------------|--------------|-------------|------------------|-------------------------------|-----------------------|----------------------|--------------------------|------------------------------|--------------------------------------|
| Participants (studies)<br>Follow up | Risk of bias | Inconsistency | Indirectness | Imprecision | Publication bias | Overall certainty of evidence | Study event rates (%) |                      | Relative effect (95% CI) | Anticipated absolute effects |                                      |
|                                     |              |               |              |             |                  |                               | With freehand surgery | With robotic surgery |                          | Risk with freehand surgery   | Risk difference with robotic surgery |

**Accuracy of pedicle screw placement (Grade A-maximum accuracy) (assessed with: Gertzbein y Robbins scale)**

|                                                |                           |                      |             |             |      |                  |                      |                      |                                  |              |                                                     |
|------------------------------------------------|---------------------------|----------------------|-------------|-------------|------|------------------|----------------------|----------------------|----------------------------------|--------------|-----------------------------------------------------|
| 3477<br>(9 RCTs) <sup>[13, 18-22, 25-27]</sup> | very serious <sup>a</sup> | serious <sup>b</sup> | not serious | not serious | none | ⊕○○○<br>VERY LOW | 1515/1779<br>(85.2%) | 1566/1698<br>(92.2%) | <b>RR 1.06</b><br>(1.01 to 1.11) | 852 per 1000 | <b>51 more per 1000</b><br>(from 9 more to 94 more) |
|------------------------------------------------|---------------------------|----------------------|-------------|-------------|------|------------------|----------------------|----------------------|----------------------------------|--------------|-----------------------------------------------------|

**Accuracy of pedicle screw placement (Grade A+B-safety zone) (assessed with: Gertzbein y Robbins scale)**

|                                                |                           |                      |             |             |      |                  |                      |                      |                                  |              |                                                      |
|------------------------------------------------|---------------------------|----------------------|-------------|-------------|------|------------------|----------------------|----------------------|----------------------------------|--------------|------------------------------------------------------|
| 3477<br>(9 RCTs) <sup>[13, 18-22, 25-27]</sup> | very serious <sup>a</sup> | serious <sup>b</sup> | not serious | not serious | none | ⊕○○○<br>VERY LOW | 1706/1779<br>(95.9%) | 1665/1698<br>(98.1%) | <b>RR 1.06</b><br>(1.01 to 1.11) | 959 per 1000 | <b>10 more per 1000</b><br>(from 0 fewer to 29 more) |
|------------------------------------------------|---------------------------|----------------------|-------------|-------------|------|------------------|----------------------|----------------------|----------------------------------|--------------|------------------------------------------------------|

**Proximal facet violation**

|                                          |                           |             |             |             |      |             |                  |                 |                                  |             |                                                         |
|------------------------------------------|---------------------------|-------------|-------------|-------------|------|-------------|------------------|-----------------|----------------------------------|-------------|---------------------------------------------------------|
| 1716<br>(3 RCTs) <sup>[13, 18, 22]</sup> | very serious <sup>c</sup> | not serious | not serious | not serious | none | ⊕⊕○○<br>LOW | 26/896<br>(2.9%) | 0/820<br>(0.0%) | <b>RR 0.07</b><br>(0.01 to 0.40) | 29 per 1000 | <b>27 fewer per 1000</b><br>(from 29 fewer to 17 fewer) |
|------------------------------------------|---------------------------|-------------|-------------|-------------|------|-------------|------------------|-----------------|----------------------------------|-------------|---------------------------------------------------------|

Certainty assessment

Summary of findings

**Distance between pedicle screw and facet joint surface (mm)**

|                                     |                           |             |             |                          |      |             |    |    |   |                                                                                      |                                                   |
|-------------------------------------|---------------------------|-------------|-------------|--------------------------|------|-------------|----|----|---|--------------------------------------------------------------------------------------|---------------------------------------------------|
| 138<br>(2 RCTs) <sup>[13, 22]</sup> | very serious <sub>d</sub> | not serious | not serious | not serious <sup>e</sup> | none | ⊕⊕○○<br>LOW | 71 | 67 | - | The mean distance between pedicle screw and facet joint surface (mm) was <b>0</b> mm | MD <b>1.69 mm more</b><br>(1.18 more to 2.2 more) |
|-------------------------------------|---------------------------|-------------|-------------|--------------------------|------|-------------|----|----|---|--------------------------------------------------------------------------------------|---------------------------------------------------|

**Mean screw deviation (mm)**

|                                |                      |             |             |             |      |                  |     |     |   |                                                    |                                                       |
|--------------------------------|----------------------|-------------|-------------|-------------|------|------------------|-----|-----|---|----------------------------------------------------|-------------------------------------------------------|
| 274<br>(1 RCT) <sup>[20]</sup> | serious <sub>f</sub> | not serious | not serious | not serious | none | ⊕⊕⊕○<br>MODERATE | 136 | 138 | - | The mean mean screw deviation (mm) was <b>0</b> mm | MD <b>2.15 mm fewer</b><br>(3.06 fewer to 1.24 fewer) |
|--------------------------------|----------------------|-------------|-------------|-------------|------|------------------|-----|-----|---|----------------------------------------------------|-------------------------------------------------------|

**Convergence angle (degree)**

|                               |                           |             |             |                          |      |             |    |    |   |                                                     |                                                 |
|-------------------------------|---------------------------|-------------|-------------|--------------------------|------|-------------|----|----|---|-----------------------------------------------------|-------------------------------------------------|
| 78<br>(1 RCT) <sup>[22]</sup> | very serious <sub>g</sub> | not serious | not serious | not serious <sup>e</sup> | none | ⊕⊕○○<br>LOW | 41 | 37 | - | The mean convergence angle (degree) was <b>0</b> mm | MD <b>6 mm more</b><br>(3.45 more to 8.55 more) |
|-------------------------------|---------------------------|-------------|-------------|--------------------------|------|-------------|----|----|---|-----------------------------------------------------|-------------------------------------------------|

**Intraoperative blood loss (mL)**

|                                         |                      |             |             |                           |      |                  |     |     |   |                                                         |                                                           |
|-----------------------------------------|----------------------|-------------|-------------|---------------------------|------|------------------|-----|-----|---|---------------------------------------------------------|-----------------------------------------------------------|
| 394<br>(3 RCTs) <sup>[13, 25, 27]</sup> | serious <sub>h</sub> | not serious | not serious | very serious <sub>i</sub> | none | ⊕○○○<br>VERY LOW | 199 | 195 | - | The mean intraoperative blood loss (mL) was <b>0</b> mL | MD <b>68.12 mL fewer</b><br>(109.24 fewer to 27.01 fewer) |
|-----------------------------------------|----------------------|-------------|-------------|---------------------------|------|------------------|-----|-----|---|---------------------------------------------------------|-----------------------------------------------------------|

Certainty assessment

Summary of findings

**Radiation dose (Standard mean difference. Measurements were made in different units:  $\mu$ Sv, mSv, and mGy)**

|                                             |                   |                      |             |             |      |                  |     |     |   |   |                                                       |
|---------------------------------------------|-------------------|----------------------|-------------|-------------|------|------------------|-----|-----|---|---|-------------------------------------------------------|
| 402<br>(4 RCTs) <sup>[13, 19, 21, 25]</sup> | very serious<br>j | serious <sup>k</sup> | not serious | not serious | none | ⊕○○○<br>VERY LOW | 203 | 199 | - | - | SMD <b>1.31 SD fewer</b><br>(2.02 fewer to 0.6 fewer) |
|---------------------------------------------|-------------------|----------------------|-------------|-------------|------|------------------|-----|-----|---|---|-------------------------------------------------------|

**Fluoroscopic time (sec)**

|                                     |                   |             |             |                      |      |                  |     |     |   |                                                   |                                                  |
|-------------------------------------|-------------------|-------------|-------------|----------------------|------|------------------|-----|-----|---|---------------------------------------------------|--------------------------------------------------|
| 262<br>(2 RCTs) <sup>[13, 19]</sup> | very serious<br>l | not serious | not serious | serious <sup>m</sup> | none | ⊕○○○<br>VERY LOW | 129 | 133 | - | The mean fluoroscopic time (sec) was <b>0</b> sec | MD <b>3 sec lower</b><br>(28 lower to 22 higher) |
|-------------------------------------|-------------------|-------------|-------------|----------------------|------|------------------|-----|-----|---|---------------------------------------------------|--------------------------------------------------|

**Total screw placement time (min)**

|                                     |                   |             |             |                   |      |                  |    |    |   |                                                            |                                                            |
|-------------------------------------|-------------------|-------------|-------------|-------------------|------|------------------|----|----|---|------------------------------------------------------------|------------------------------------------------------------|
| 108<br>(2 RCTs) <sup>[19, 25]</sup> | very serious<br>l | not serious | not serious | very serious<br>n | none | ⊕○○○<br>VERY LOW | 50 | 58 | - | The mean total screw placement time (min) was <b>0</b> min | MD <b>0.84 min higher</b><br>(10.93 lower to 12.61 higher) |
|-------------------------------------|-------------------|-------------|-------------|-------------------|------|------------------|----|----|---|------------------------------------------------------------|------------------------------------------------------------|

**Operating time (min)**

|                                            |                   |             |             |             |      |             |     |     |   |                                                                    |                                                            |
|--------------------------------------------|-------------------|-------------|-------------|-------------|------|-------------|-----|-----|---|--------------------------------------------------------------------|------------------------------------------------------------|
| 492<br>(5 RCTs) <sup>[13, 20-22, 25]</sup> | very serious<br>o | not serious | not serious | not serious | none | ⊕⊕○○<br>LOW | 247 | 245 | - | The mean duration of the intervention (min) was <b>207</b> minutos | MD <b>6.45 minutos more</b><br>(13.59 fewer to 26.49 more) |
|--------------------------------------------|-------------------|-------------|-------------|-------------|------|-------------|-----|-----|---|--------------------------------------------------------------------|------------------------------------------------------------|

Certainty assessment

Summary of findings

**Length of hospital stay (days)**

|                                         |                      |                      |             |                      |      |                  |     |     |   |                                                        |                                                     |
|-----------------------------------------|----------------------|----------------------|-------------|----------------------|------|------------------|-----|-----|---|--------------------------------------------------------|-----------------------------------------------------|
| 374<br>(3 RCTs) <sup>[13, 21, 25]</sup> | serious <sup>p</sup> | serious <sup>q</sup> | not serious | serious <sup>m</sup> | none | ⊕○○○<br>VERY LOW | 189 | 185 | - | The mean length of hospital stay (days) was <b>189</b> | MD <b>0.36 lower</b><br>(1.03 lower to 0.31 higher) |
|-----------------------------------------|----------------------|----------------------|-------------|----------------------|------|------------------|-----|-----|---|--------------------------------------------------------|-----------------------------------------------------|

**Back pain change (Visual Analog Pain Scale)**

|                                          |                           |             |             |             |      |             |    |    |   |                                                                   |                                                      |
|------------------------------------------|---------------------------|-------------|-------------|-------------|------|-------------|----|----|---|-------------------------------------------------------------------|------------------------------------------------------|
| 130<br>(2 RCTs) <sup>[13, 22]</sup> FENG | very serious <sup>r</sup> | not serious | not serious | not serious | none | ⊕⊕○○<br>LOW | 67 | 63 | - | The mean back pain change (Visual Analog Pain Scale) was <b>0</b> | MD <b>0.06 higher</b><br>(0.53 lower to 0.64 higher) |
|------------------------------------------|---------------------------|-------------|-------------|-------------|------|-------------|----|----|---|-------------------------------------------------------------------|------------------------------------------------------|

**Leg pain change (Visual Analog Pain Scale)**

|                                          |                           |             |             |             |      |             |    |    |   |                                                                  |                                                     |
|------------------------------------------|---------------------------|-------------|-------------|-------------|------|-------------|----|----|---|------------------------------------------------------------------|-----------------------------------------------------|
| 130<br>(2 RCTs) <sup>[13, 22]</sup> FENF | very serious <sup>r</sup> | not serious | not serious | not serious | none | ⊕⊕○○<br>LOW | 67 | 63 | - | The mean leg pain change (Visual Analog Pain Scale) was <b>0</b> | MD <b>0.13 lower</b><br>(0.75 lower to 0.49 higher) |
|------------------------------------------|---------------------------|-------------|-------------|-------------|------|-------------|----|----|---|------------------------------------------------------------------|-----------------------------------------------------|

**Oswestry Disability Index**

|                                          |                           |             |             |             |      |             |    |    |   |                                                 |                                                     |
|------------------------------------------|---------------------------|-------------|-------------|-------------|------|-------------|----|----|---|-------------------------------------------------|-----------------------------------------------------|
| 130<br>(2 RCTs) <sup>[13, 22]</sup> FENG | very serious <sup>r</sup> | not serious | not serious | not serious | none | ⊕⊕○○<br>LOW | 67 | 63 | - | The mean oswestry Disability Index was <b>0</b> | MD <b>0.58 lower</b><br>(4.19 lower to 3.03 higher) |
|------------------------------------------|---------------------------|-------------|-------------|-------------|------|-------------|----|----|---|-------------------------------------------------|-----------------------------------------------------|

| Certainty assessment |  |  |  |  |  | Summary of findings |  |  |  |  |  |
|----------------------|--|--|--|--|--|---------------------|--|--|--|--|--|
|----------------------|--|--|--|--|--|---------------------|--|--|--|--|--|

### Short Form 36-item Health Survey (physical health)

|                               |                           |             |             |             |      |             |    |    |   |                                                                          |                                                      |
|-------------------------------|---------------------------|-------------|-------------|-------------|------|-------------|----|----|---|--------------------------------------------------------------------------|------------------------------------------------------|
| 70<br>(1 RCT) <sup>[22]</sup> | very serious <sup>g</sup> | not serious | not serious | not serious | none | ⊕⊕○○<br>LOW | 33 | 37 | - | The mean short Form 36-item Health Survey (physical health) was <b>0</b> | MD <b>5.4 higher</b><br>(1.03 lower to 11.83 higher) |
|-------------------------------|---------------------------|-------------|-------------|-------------|------|-------------|----|----|---|--------------------------------------------------------------------------|------------------------------------------------------|

### Short Form 36-item Health Survey (mental health)

|                               |                           |             |             |             |      |             |    |    |   |                                                                        |                                                    |
|-------------------------------|---------------------------|-------------|-------------|-------------|------|-------------|----|----|---|------------------------------------------------------------------------|----------------------------------------------------|
| 70<br>(1 RCT) <sup>[22]</sup> | very serious <sup>g</sup> | not serious | not serious | not serious | none | ⊕⊕○○<br>LOW | 33 | 37 | - | The mean short Form 36-item Health Survey (mental health) was <b>0</b> | MD <b>0.7 lower</b><br>(9.13 lower to 7.73 higher) |
|-------------------------------|---------------------------|-------------|-------------|-------------|------|-------------|----|----|---|------------------------------------------------------------------------|----------------------------------------------------|

### Surgical Site Infection

|                                    |                      |             |             |                           |      |                  |                 |                 |                                  |             |                                                        |
|------------------------------------|----------------------|-------------|-------------|---------------------------|------|------------------|-----------------|-----------------|----------------------------------|-------------|--------------------------------------------------------|
| 207<br>(2 RCT) <sup>[25, 26]</sup> | serious <sup>f</sup> | not serious | not serious | very serious <sup>i</sup> | none | ⊕○○○<br>VERY LOW | 3/106<br>(2.8%) | 1/101<br>(1.0%) | <b>RR 0.45</b><br>(0.07 to 2.98) | 28 per 1000 | <b>16 fewer per 1000</b><br>(from 26 fewer to 56 more) |
|------------------------------------|----------------------|-------------|-------------|---------------------------|------|------------------|-----------------|-----------------|----------------------------------|-------------|--------------------------------------------------------|

### Other complications

| Certainty assessment    |              |             |             |                      |      |             | Summary of findings |                 |                                  |             |                                                        |
|-------------------------|--------------|-------------|-------------|----------------------|------|-------------|---------------------|-----------------|----------------------------------|-------------|--------------------------------------------------------|
| 207<br>(2 RCT) [25, 26] | serious<br>f | not serious | not serious | serious <sup>m</sup> | none | ⊕⊕○○<br>LOW | 7/106<br>(6.6%)     | 1/101<br>(1.0%) | <b>RR 0.21</b><br>(0.04 to 1.20) | 66 per 1000 | <b>52 fewer per 1000</b><br>(from 63 fewer to 13 more) |

**CI:** Confidence interval; **RR:** Risk ratio; **MD:** Mean difference; **SMD:** Standardized mean difference

## Explanations

- a. High risk of bias due to high or unclear risk of random sequence generation or allocation concealment was observed in five of seven studies. Performance risk of bias was observed in five studies and lack of blinding of outcome investigations in two studies. Unclear risk due to incomplete data was observed in two studies and reporting bias in one study.
- b. Unexplained heterogeneity;  $I^2=75%$  (inconsistency -1)
- c. High risk of bias was observed due to allocation concealment and lack of blinding of participant, personnel and investigators in one study and unclear risk in detection bias in two studies.
- d. High risk of bias was observed due to allocation concealment and lack of blinding of participant, personnel and investigators in one study and unclear risk in detection bias in other study.
- e. Very small sample size and narrow confidence interval not crossing the line of no effect. No imprecision.
- f. Unclear bias in random sequence generation, allocation concealment and participants and personnel blinding was observed.
- g. High risk related with allocation concealment and lack of participants, personnel blinding was observed. The study shows unclear risk in random sequence generation.
- h. Unclear risk of selection bias, detection bias and attrition bias has been observed.
- i. Small sample size and very wide confidence interval crossing the line of no effect (imprecision -2)
- j. One study shows a high risk of bias in random sequence generation and allocation concealment and lack of participant, personnel and investigators blinding. Others studies present unclear risk in selection bias, detection bias and attrition bias.
- k. Unexplained heterogeneity;  $I^2=83%$  (inconsistency -1)
- l. High or unclear of risk bias due to problems in random sequence generation and allocation concealment and lack of participant, personnel and investigators blinding were observed.
- m. Small sample size and wide confidence interval crossing the line of no effect (imprecision -1).
- n. Very small sample size and wide confidence interval crossing the line of no effect (imprecision -2).
- o. High or unclear of risk bias due to problems in random sequence generation and allocation concealment and lack of participant, personnel and investigators blinding were observed.
- p. Unclear bias in related with random sequence generation, allocation concealment, blinding of participants and personnel and unclear detection bias and attrition bias was observed.
- q. Unexplained heterogeneity;  $I^2=62%$  (inconsistency -1)
- r. High risk or unclear bias related with random sequence generation, allocation concealment and lack of participants, personnel and investigators blinding was observed.
